# Supplementary material for: Endocytosis Deficient Murine Xcl1-Fusion Vaccine Enhances Protective Antibody Responses in Mice
Source: PubMed Central journal article supplement (PMC6533920; doi:10.3389/fimmu.2019.01086), 2019-05-17

## **Supplementary information**

### **Endocytosis deficient murine Xcl1-fusion vaccine enhances protective antibody responses in mice.**

Arnar Gudjonsson<sup>1</sup>, Tor Kristian Andersen<sup>1</sup>, Vibeke Sundvold-Gjerstad<sup>3</sup>,  
Bjarne Bogen<sup>1,2,\*</sup>, and Even Fossum<sup>1,\*</sup>

<sup>1</sup>K.G. Jebsen Centre for Influenza Vaccine Research, Institute of Immunology,  
University of Oslo and Oslo University Hospital, 0450 Oslo, Norway.

<sup>2</sup>Centre for Immune Regulation, Institute of Immunology, University of Oslo  
and Oslo University Hospital, 0027 Oslo, Norway.

<sup>3</sup>Department of Molecular Medicine, Institute of Basic Medical Sciences,  
University of Oslo, 0317 Oslo, Norway.

\* Correspondence and requests for materials should be sent to:

Even Fossum or Bjarne Bogen

Institute of Immunology

Oslo University Hospital

Songsvannveien 20

0027 Oslo,

Norway

Phone: +47 23 07 30 45

Fax: +47 23 07 35 10

[Even.fossum@rr-research.no](mailto:Even.fossum@rr-research.no)

[Bjarne.Bogen@medisin.uio.no](mailto:Bjarne.Bogen@medisin.uio.no)

## **SUPPLEMENTARY FIGURE.**

(A) Schematic representation of the vaccibody molecule containing a targeting unit (Xcl1 or Xcl1( $\Delta$ 1)), a dimerization domain and antigenic unit (hemagglutinin or mCherry). (B) BM-derived Flt3L-induced DCs were defined as CD45R/B220<sup>-</sup>CD11c<sup>+</sup> and further divided into CD24<sup>+</sup> (cDC1) or CD11b<sup>+</sup> (cDC2). (C) Splenic DCs were defined as CD3e<sup>-</sup>CD19<sup>-</sup>CD49b<sup>-</sup>Ly6G<sup>-</sup>MHC-II<sup>+</sup>CD11C<sup>+</sup> and further split into CD24<sup>+</sup> (cDC1) or CD11b<sup>+</sup> (cDC2). (D) Spleens were harvested from mice three days after i.p. injection with 200  $\mu$ g of depleting or isotype matched antibodies. T cells were defined as CD45R/B220<sup>-</sup>CD3<sup>+</sup>.

Supplementary Figure

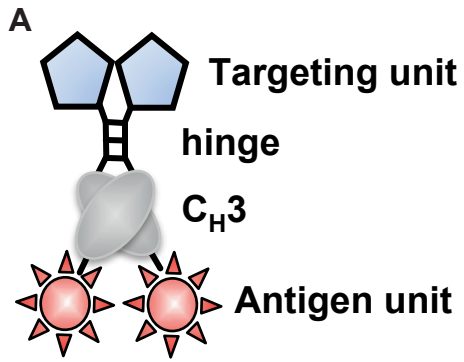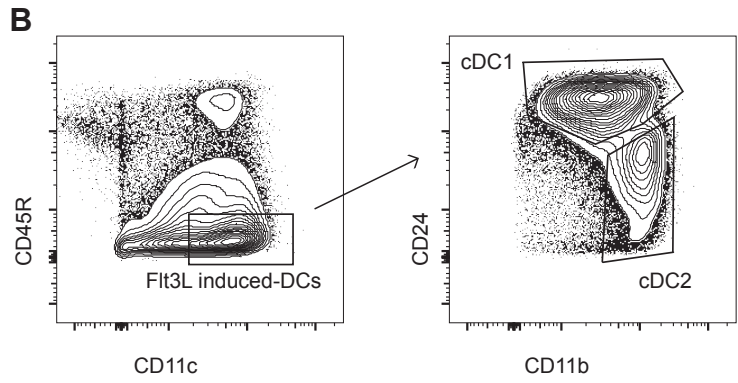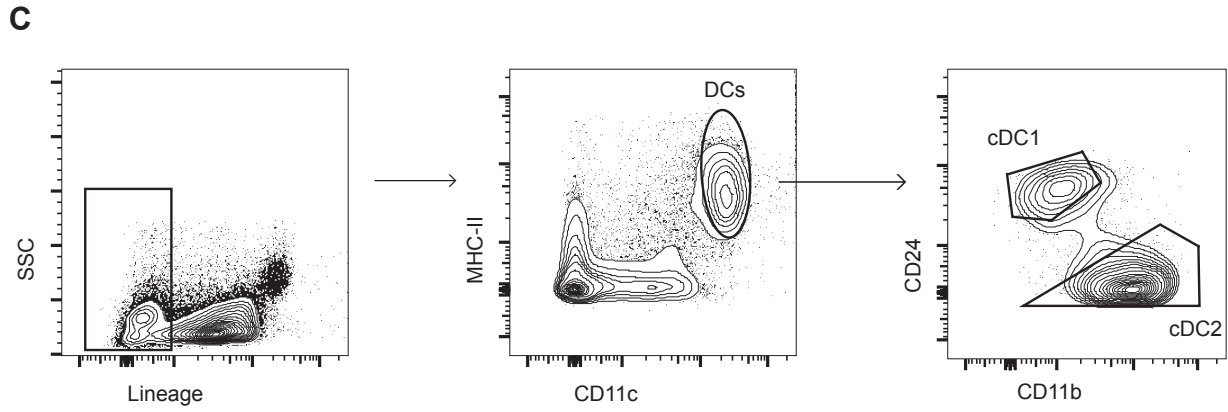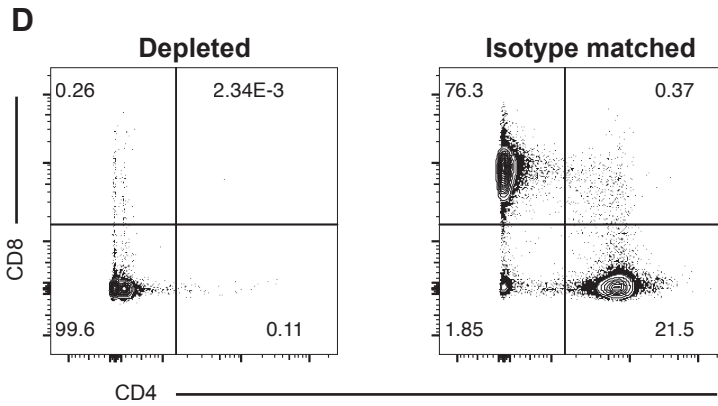

Supplement: Data_Sheet_1.pdf [file Data_Sheet_1.pdf]
